# Supplementary material for: Inhibitory Effects of Loganin on Adipogenesis In Vitro and In Vivo
Source: MDPI journal article supplement (doi:10.3390/ijms24054752), 2023-03-01
Supplement: s1 [file s1]

# Inhibitory Effects of Loganin on Adipogenesis In Vitro and In Vivo

Hyoju Jeon <sup>1,2,†</sup>, Chang-Gun Lee <sup>1,2,†,‡</sup>, Hyesoo Jeong <sup>3</sup>, Seong-Hoon Yun <sup>3</sup>, Jeonghyun Kim <sup>1,2</sup>, Laxmi Prasad Uprety <sup>1,2</sup>, Kang-Il Oh <sup>1,2</sup>, Shivani Singh <sup>1,2</sup>, Jisu Yoo <sup>1,2</sup>, Eunkuk Park <sup>1,2,\*</sup> and Seon-Yong Jeong <sup>1,2,3,\*</sup>

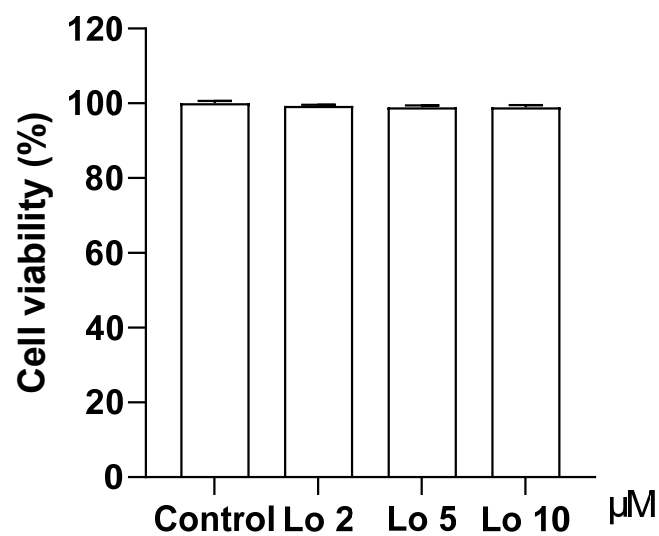

**Supplementary Figure S1.** Cellular viability test for loganin on 3T3-L1 cell.
